# Supplementary material
Source: HighWire-hosted journal article supplement (https://jitc.bmj.com/content/11/6/e006287)
Supplement: inline-supplementary-material-2 [file inline-supplementary-material-2.pdf]

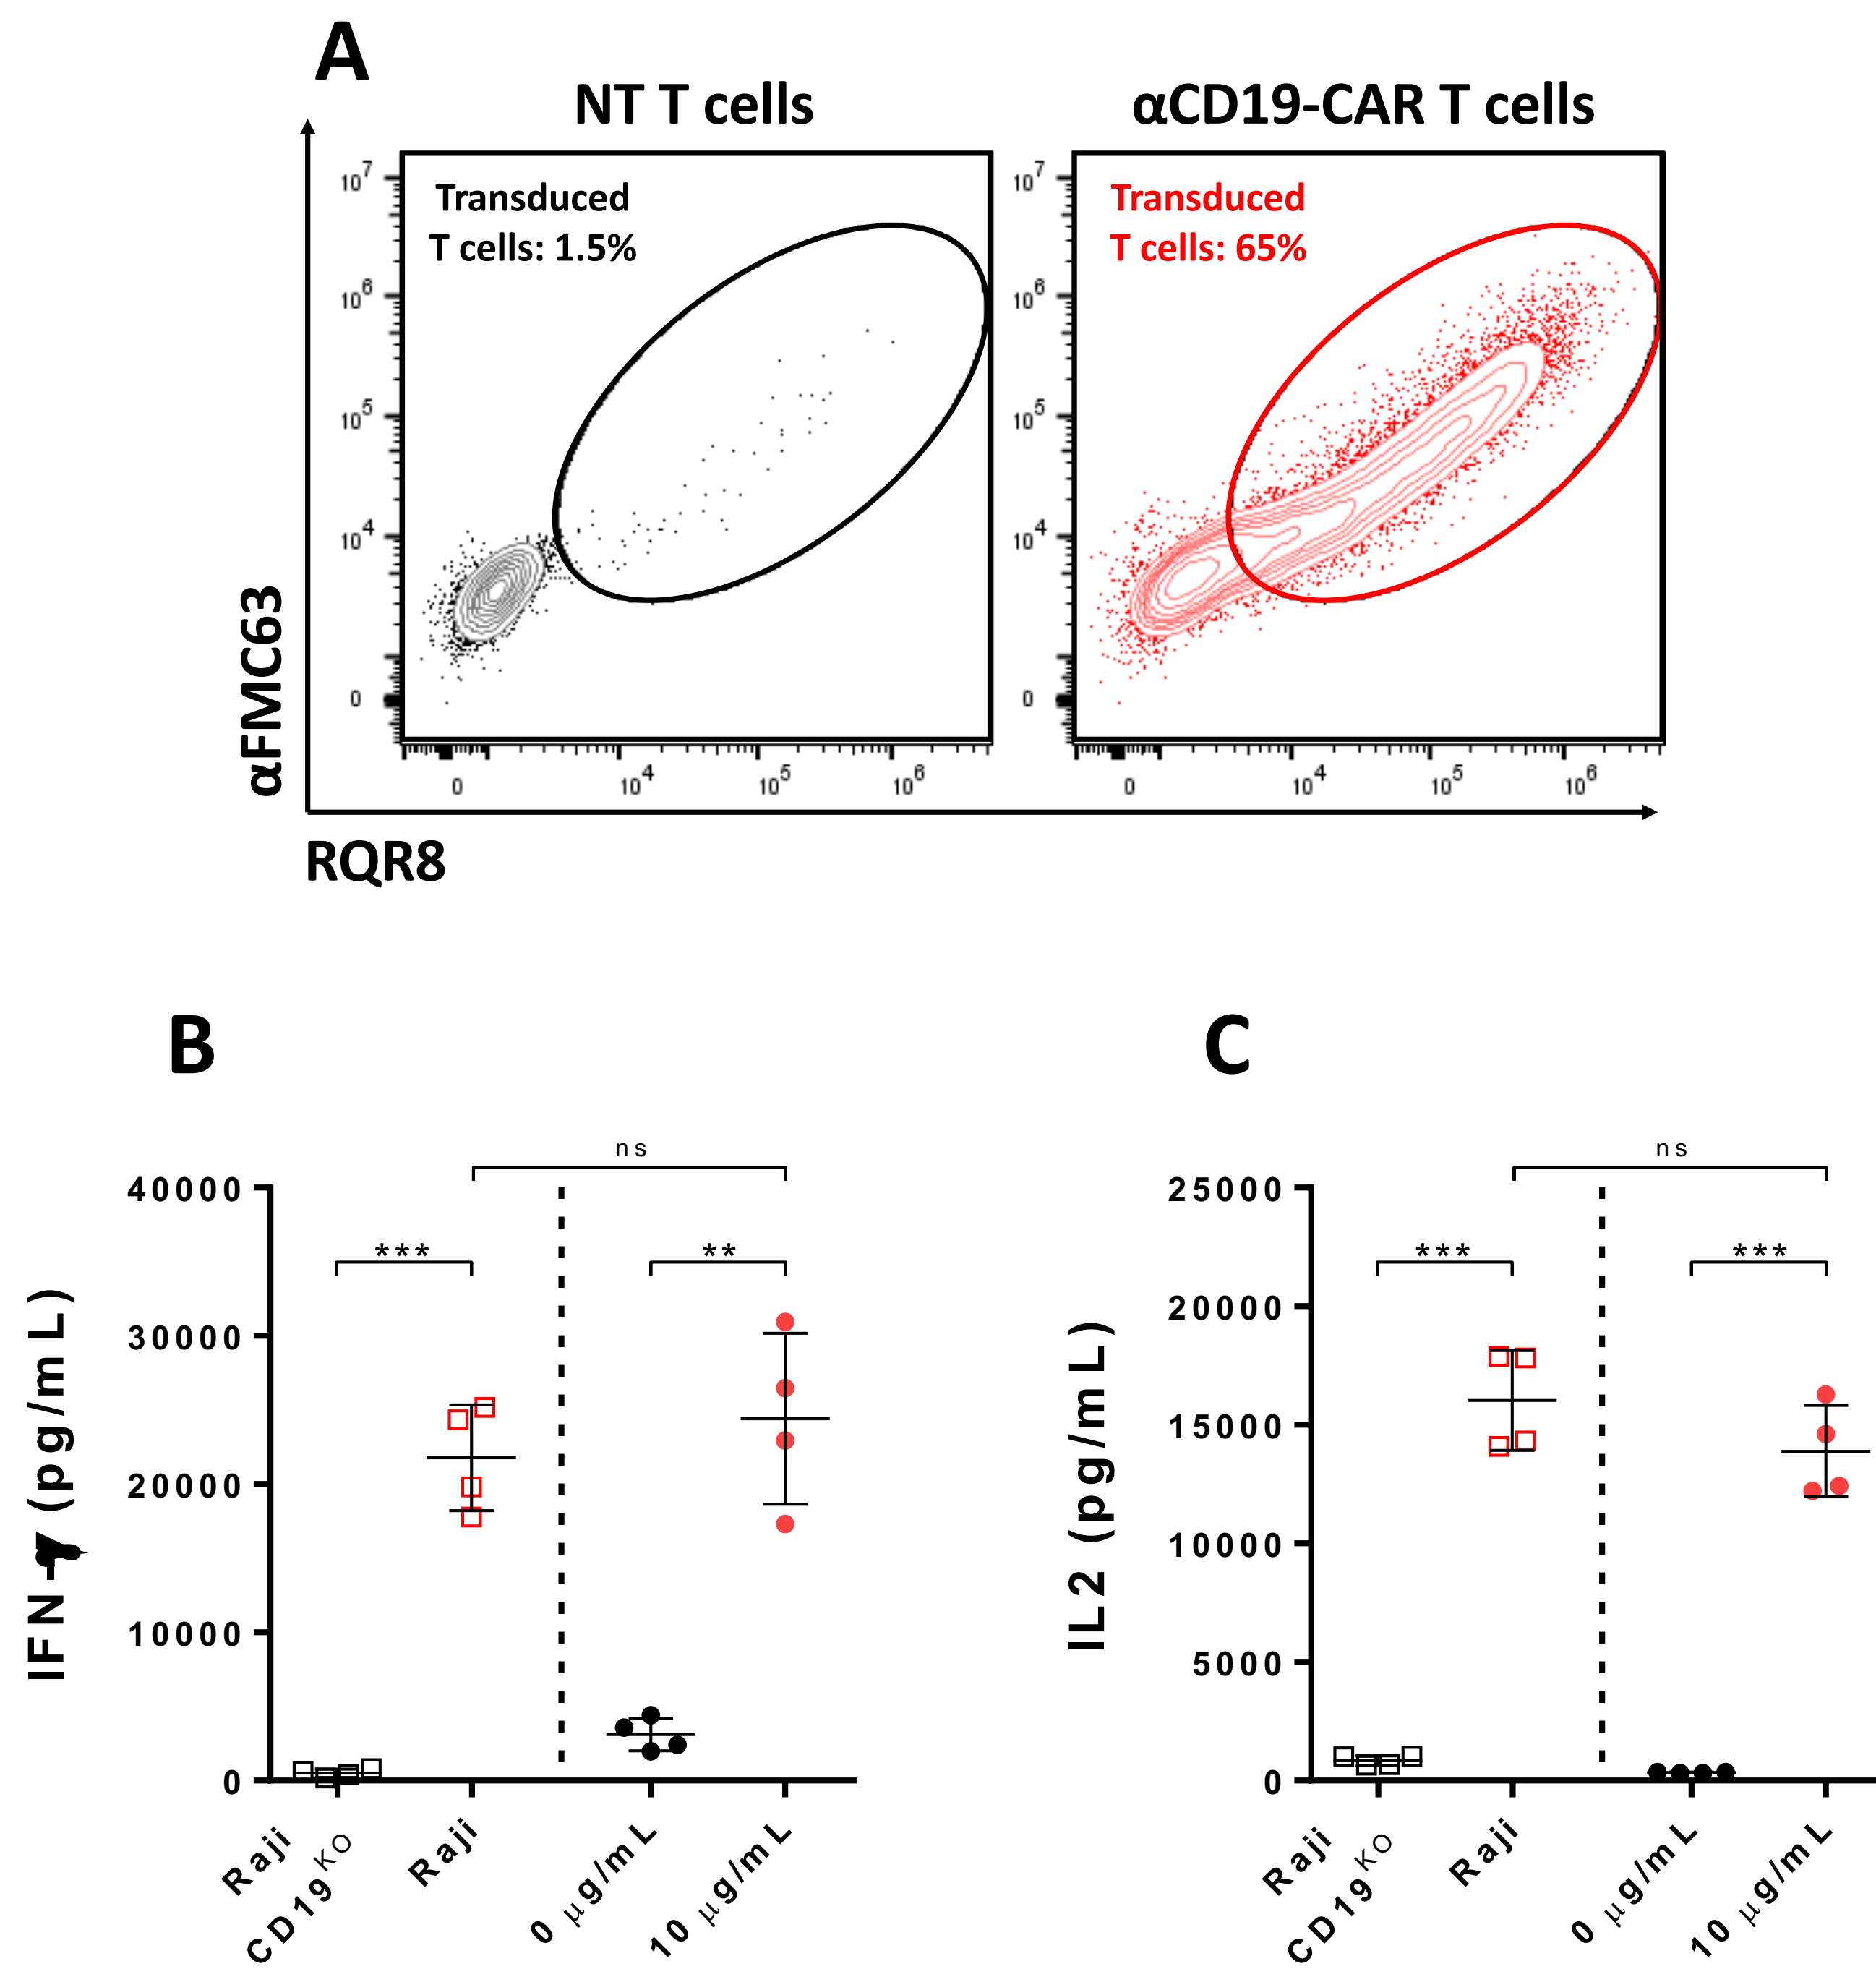

**Supplementary figure 2: Activation of CAR T cells with plate-bound anti-idiotype antibody.**

(A) Representative histogram of  $\alpha$ FMC63 antibody staining on non-transduced or  $\alpha$ CD19-CAR T cells. (B) IFN- $\gamma$  and (C) IL-2 production on CAR T cells activated with plate-bound  $\alpha$ FMC63 or Raji cells for 24 hours. Pooled data of two independent experiments,  $n = 4$  healthy donors per group. Bars are the mean  $\pm$  SD. \*\* $p < 0.01$ , \*\*\* $p < 0.001$ , ns = non-significant by Paired t-test.
