# Supplementary material
Source: HighWire-hosted journal article supplement (https://jitc.bmj.com/content/11/6/e006287)
Supplement: inline-supplementary-material-5 [file inline-supplementary-material-5.pdf]

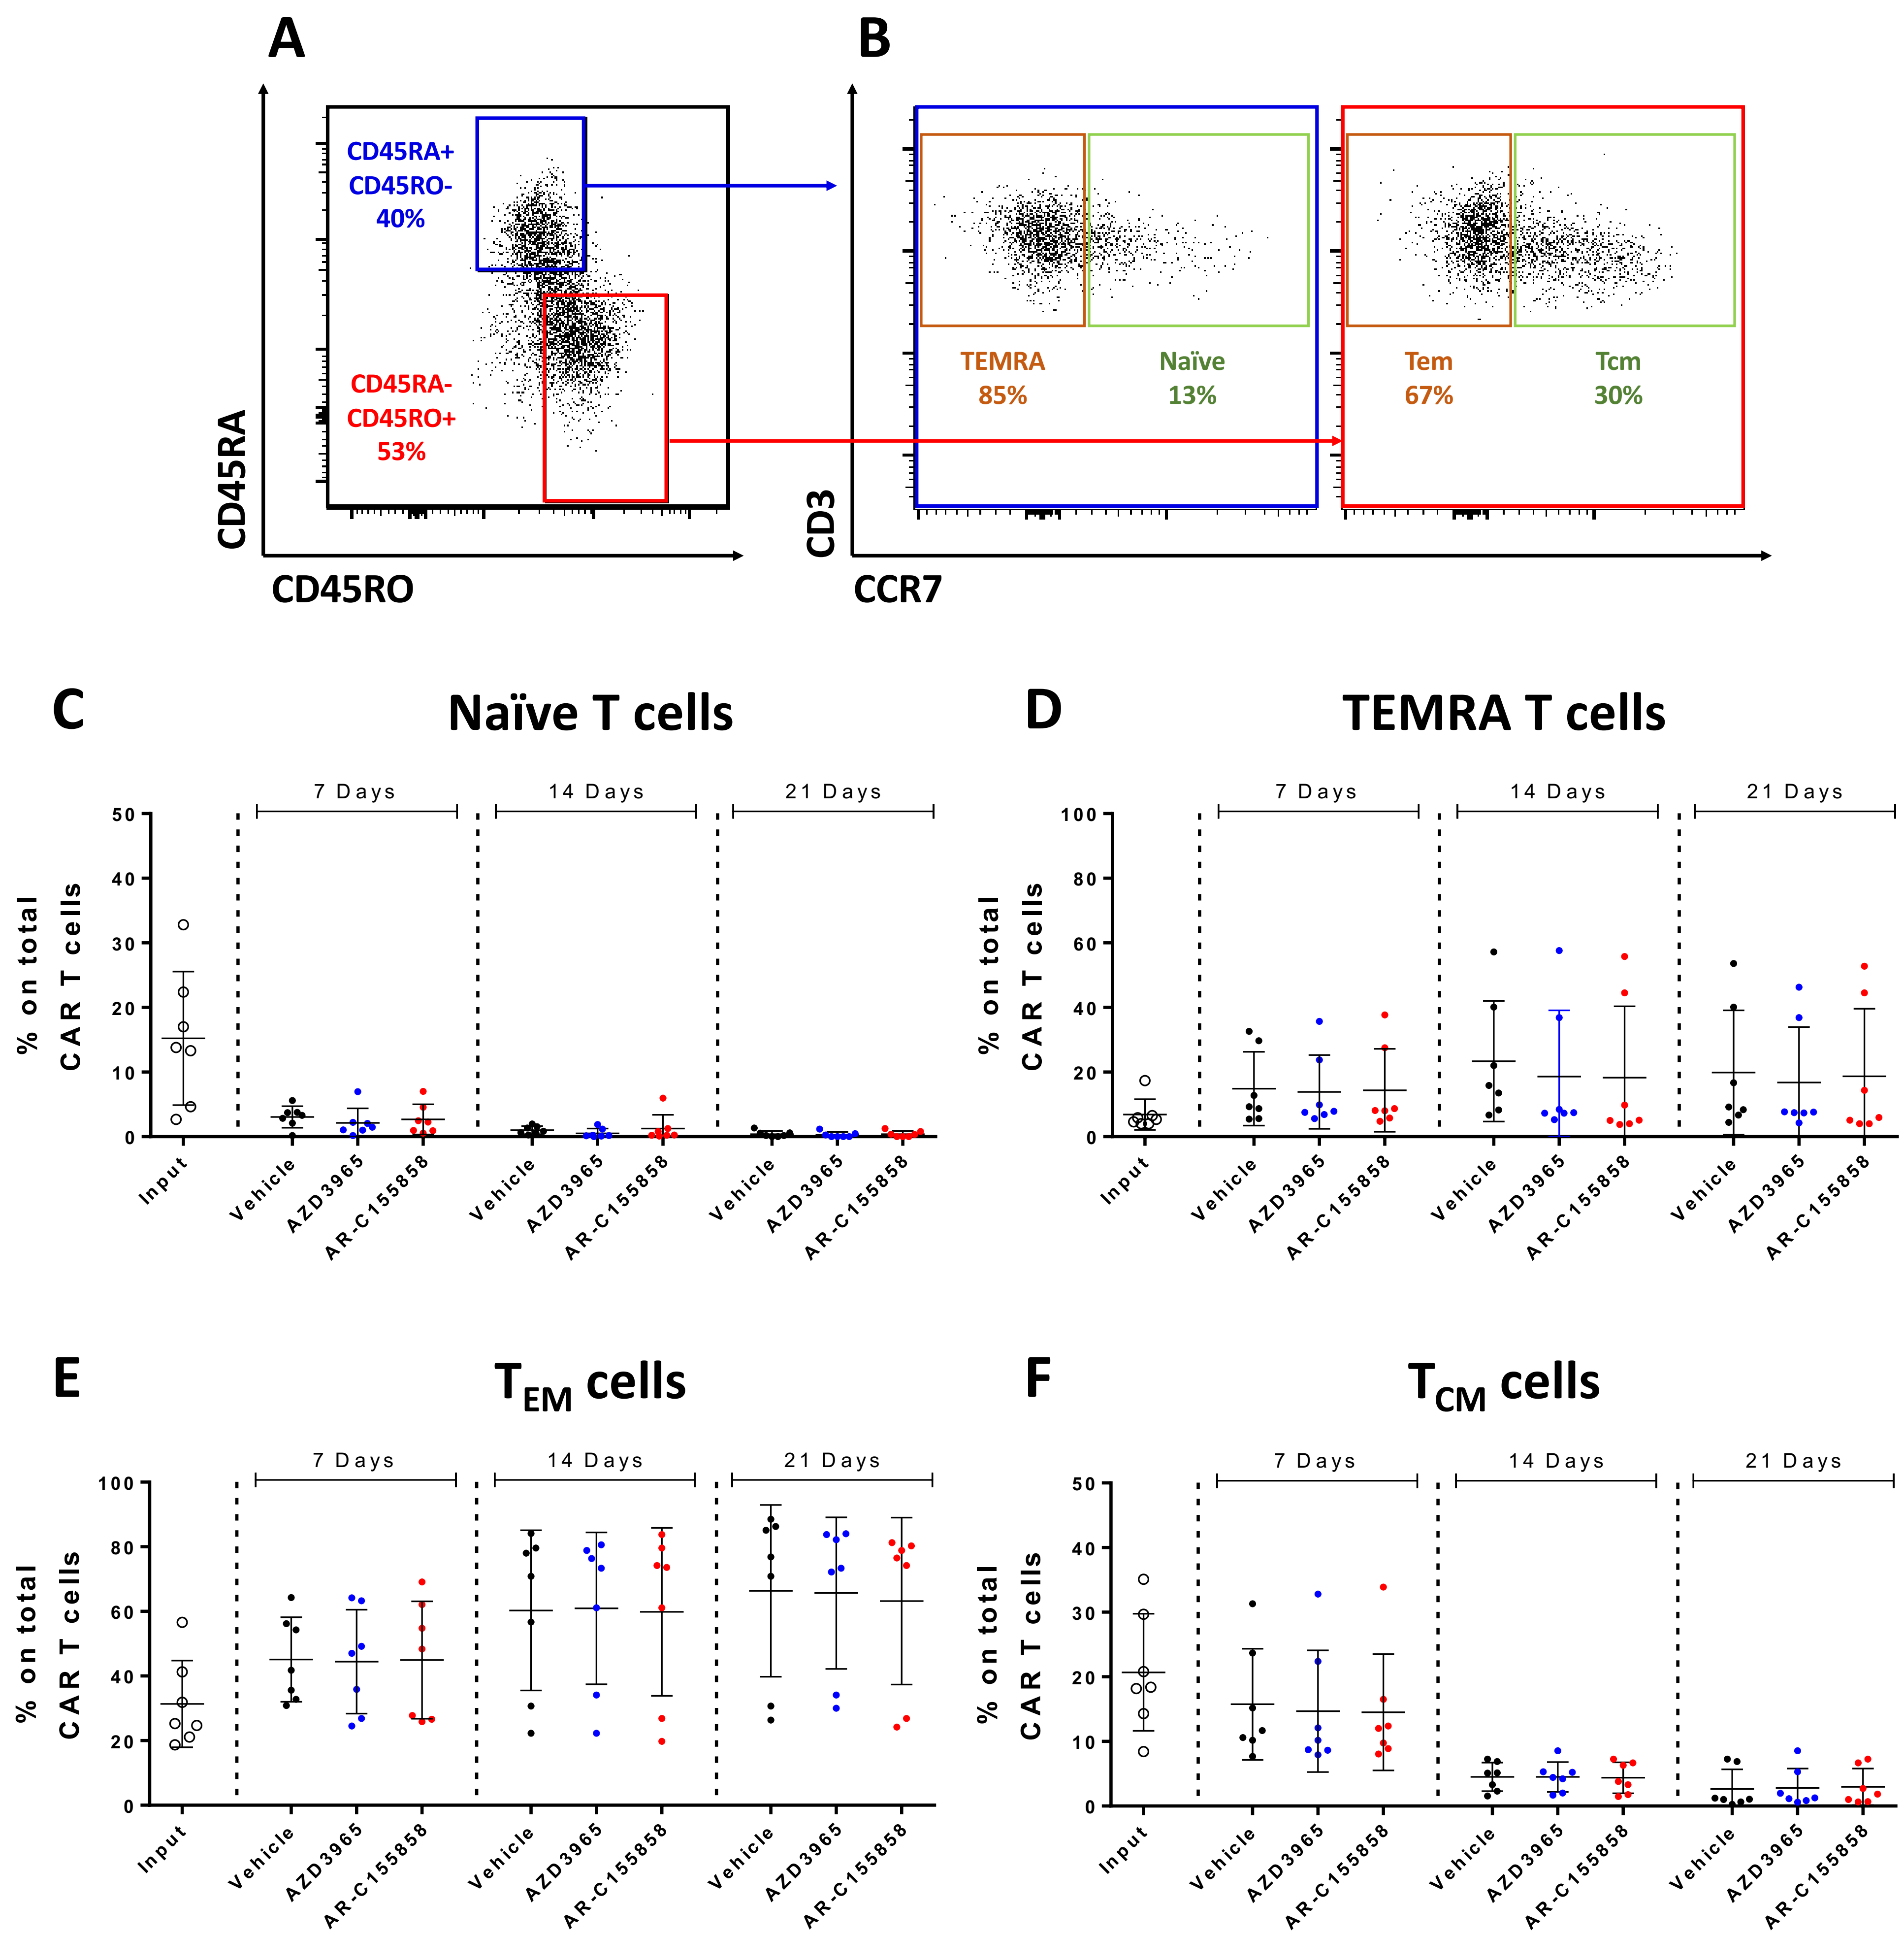

**Supplementary figure 5: Memory phenotype of CAR T cells after long exposures of MCT-1 blockers.**  $\alpha$ CD19-CAR T cells were re-stimulated with Raji cells every 7 days. (A-B) Representative expression of CD45RA, CD45RO and CCR7 on CAR T cells. (C) Percentage of naïve T cells, (D) TEMRA T cells, (E) effector memory T (Tem) and (F) central memory T (Tcm) cells measured by flow cytometry every 7 days. Pooled data of three independent experiments,  $n = 7$  healthy donors per group. Bars are the mean  $\pm$  SD. ns = non-significant by Friedman One-Way ANOVA.
