# Supplementary material
Source: HighWire-hosted journal article supplement (https://jitc.bmj.com/content/11/6/e006287)
Supplement: inline-supplementary-material-7 [file inline-supplementary-material-7.pdf]

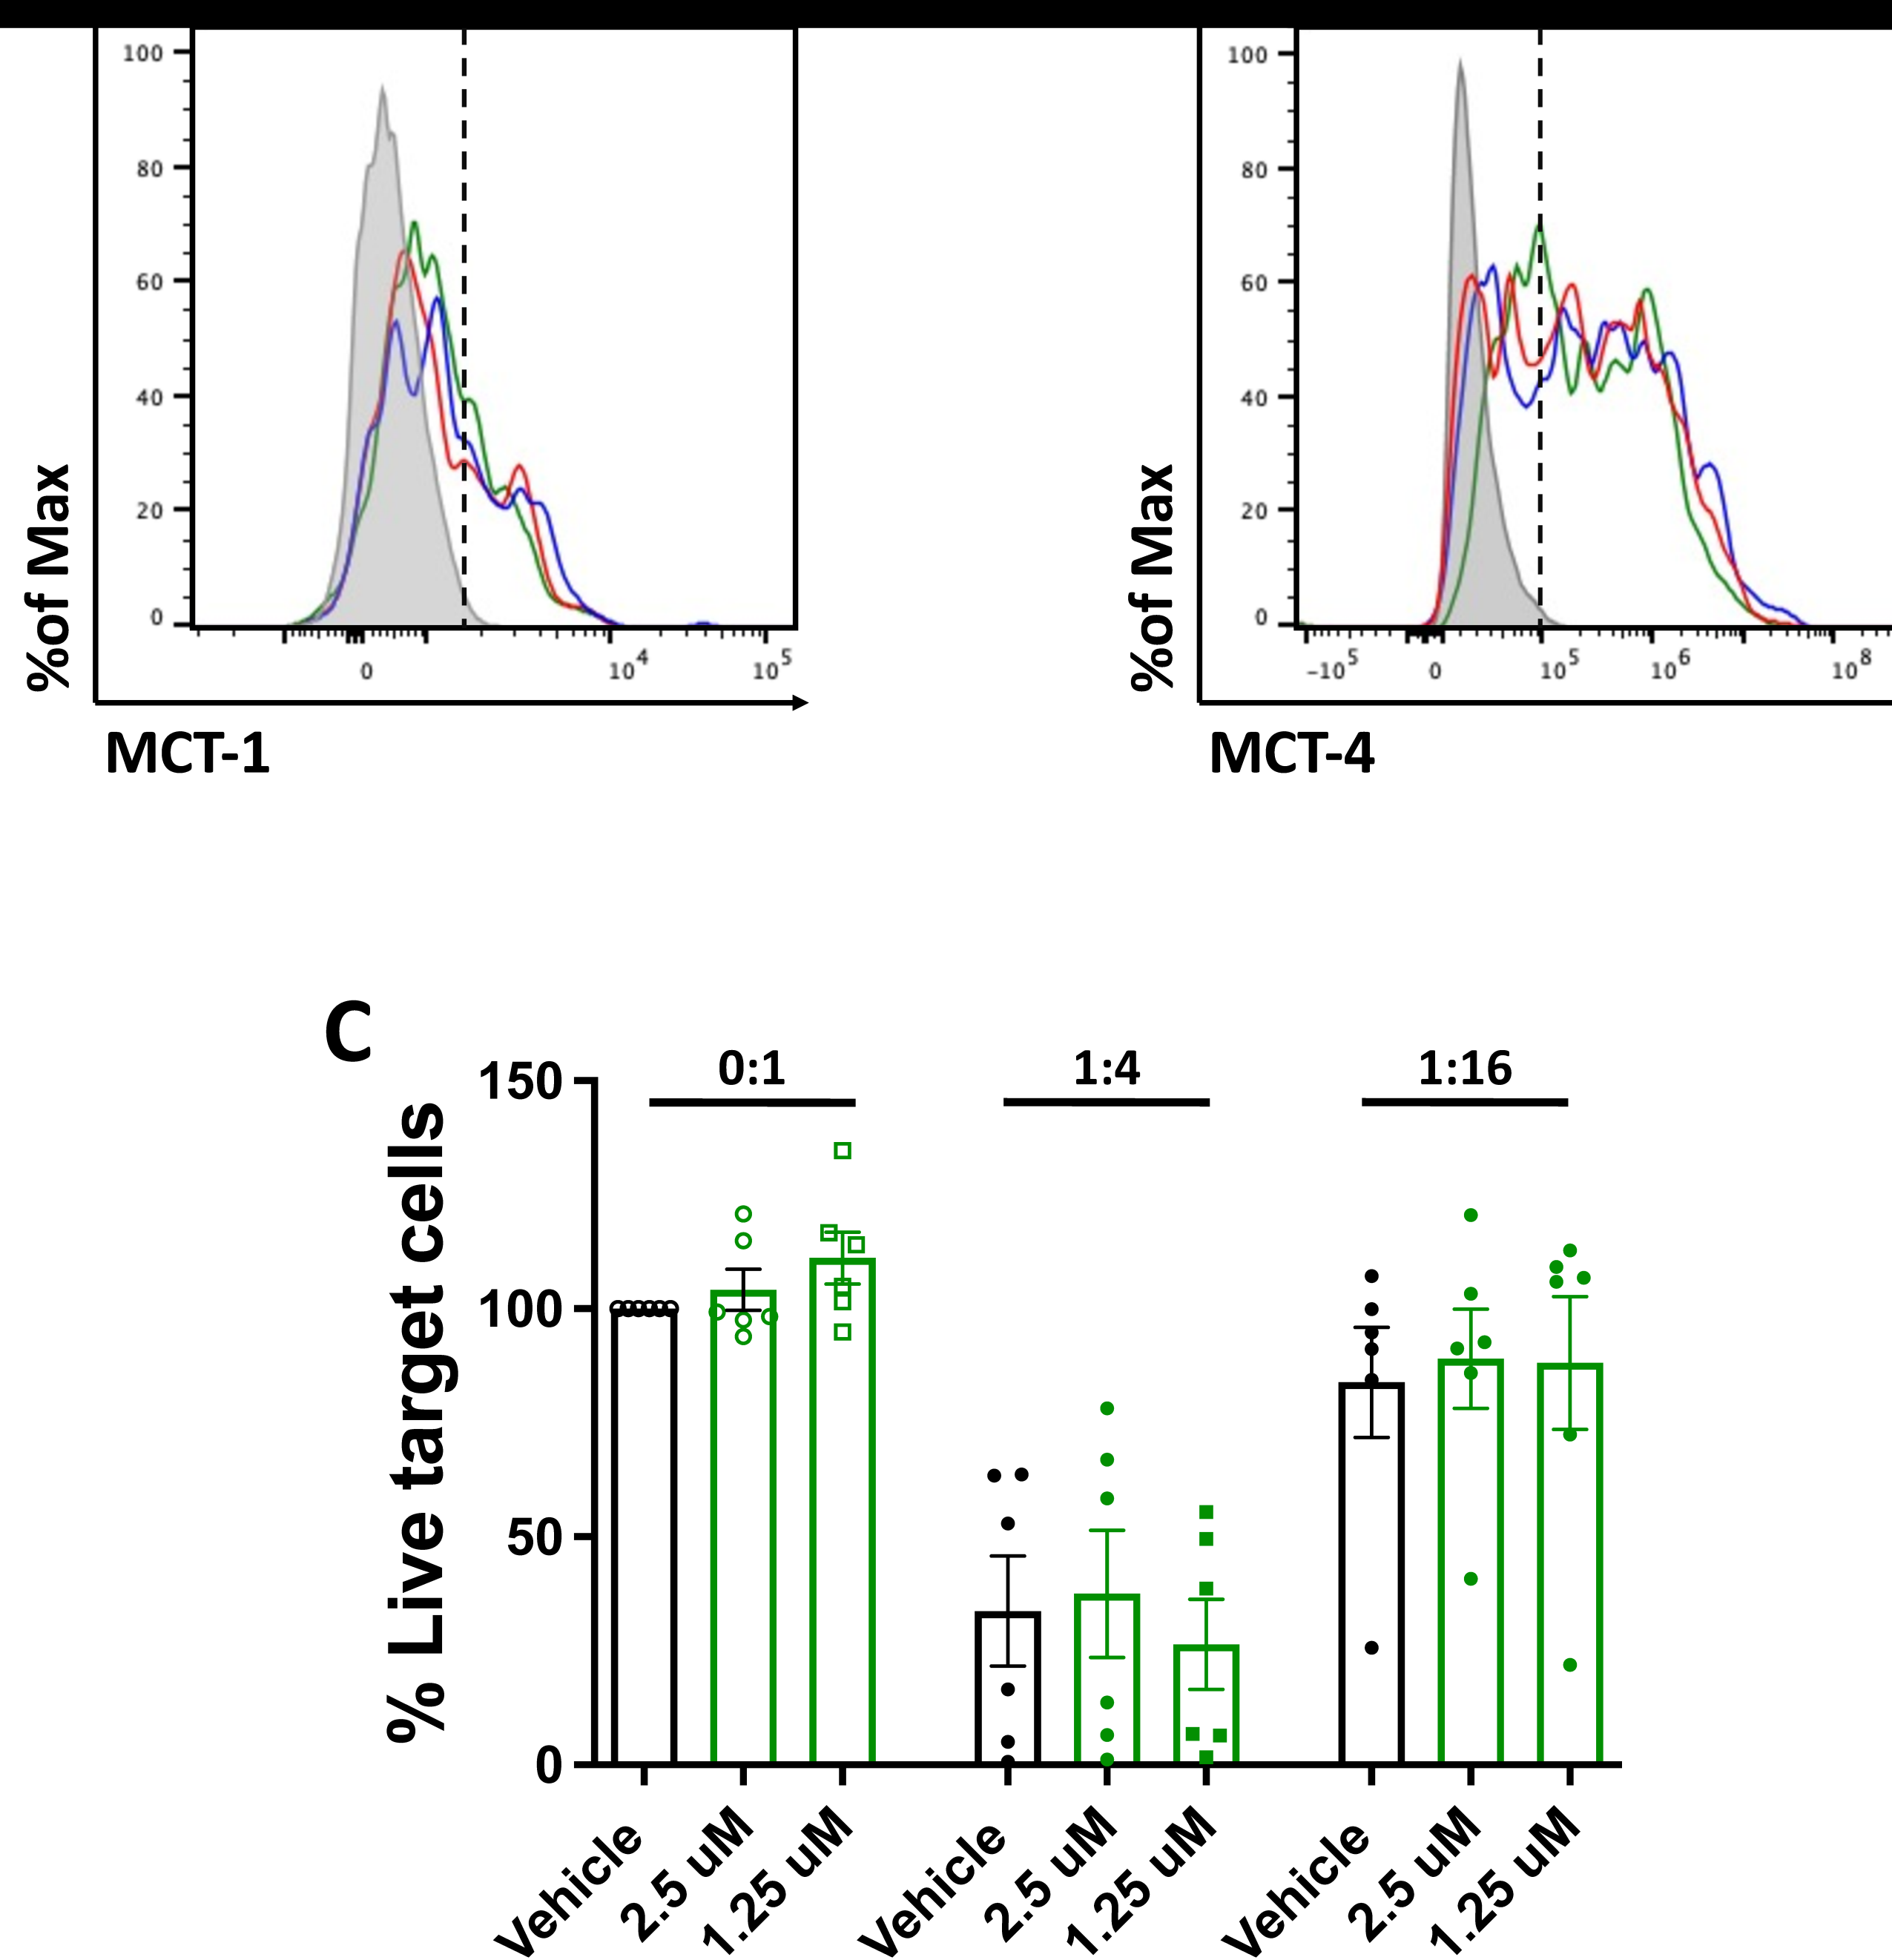

**Supplementary figure 7: CAR T cells cultured with syrosingopine.**  $\alpha$ CD19-CAR T cells were cultured with different concentrations of syrosingopine or vehicle as control. Expression of **(A)** MCT-1 and **(B)** MCT-4 on  $\alpha$ CD19-CAR T cells cultured with target tumour cells and syrosingopine for 24 hours. Representative data of two independent experiments, n = 4 healthy donors per group. **(C)** Percentage of live Raji cells cultured with CAR T cells at different effector: target ratios (E:T) ratios. Pooled data of two independent experiments, n = 6 healthy donors per group. Bars are the mean  $\pm$  SEM.
