# Supplementary material
Source: HighWire-hosted journal article supplement (https://jitc.bmj.com/content/11/6/e006287)
Supplement: inline-supplementary-material-8 [file inline-supplementary-material-8.pdf]

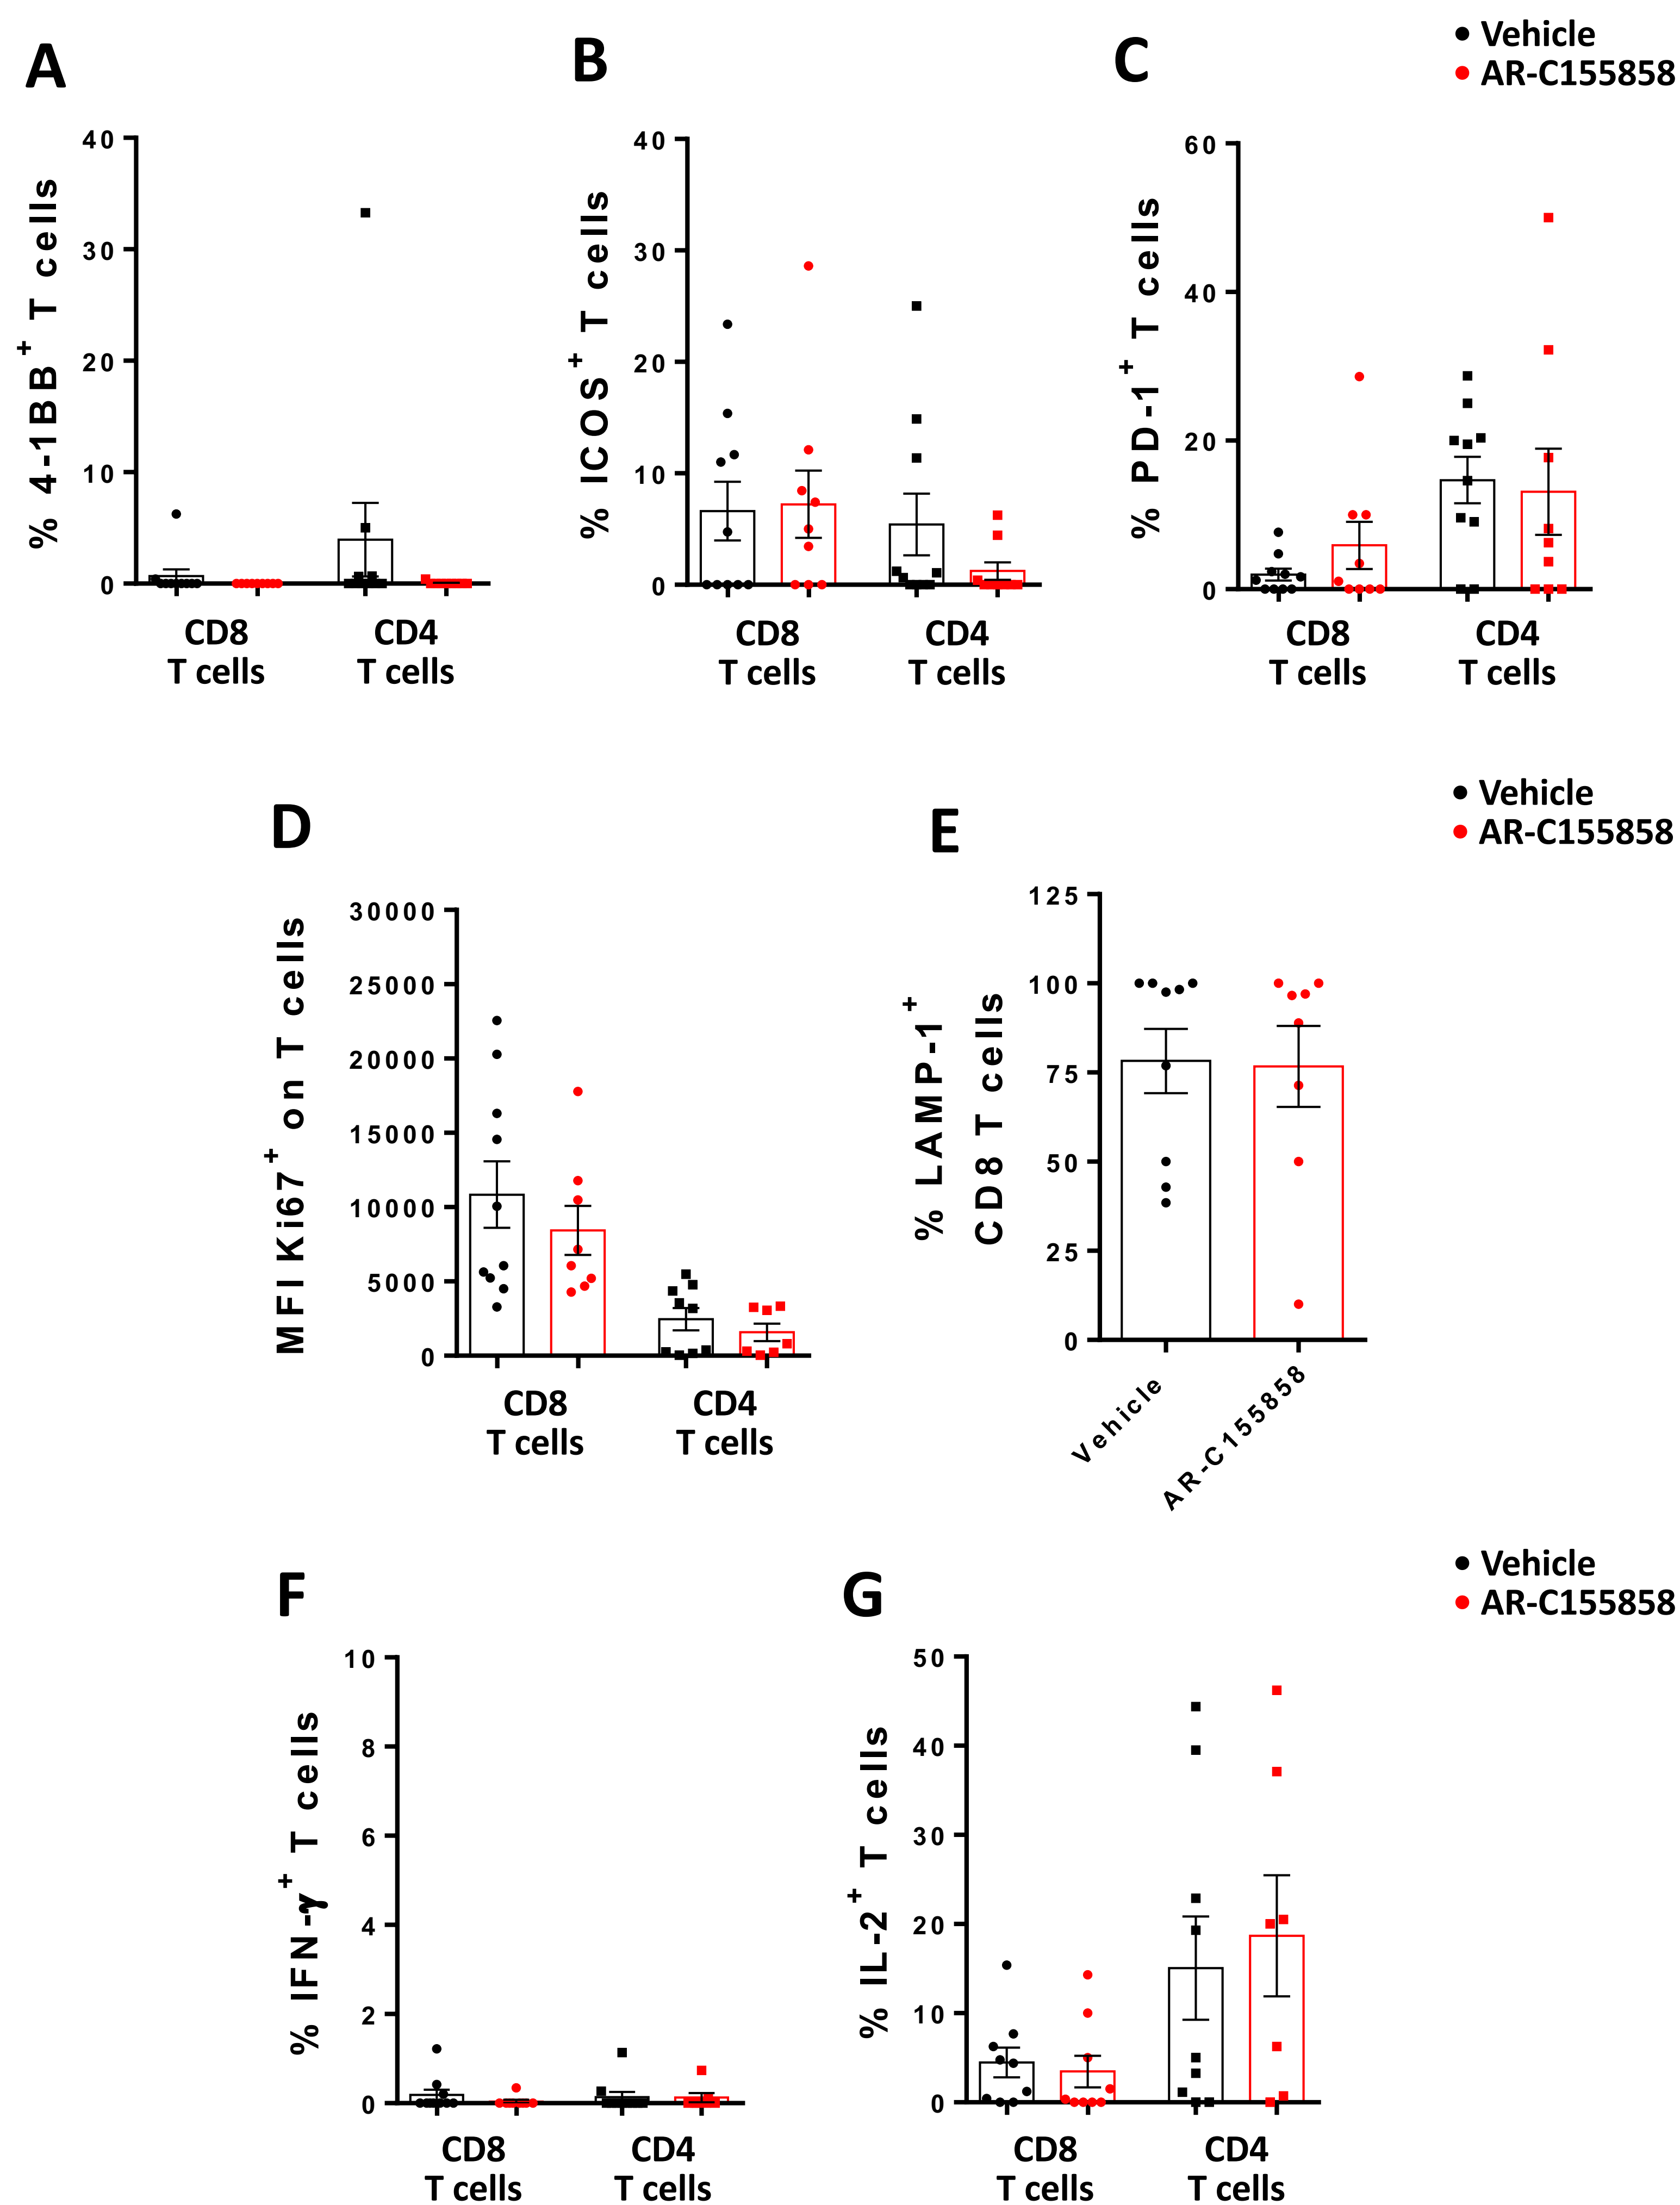

**Supplementary figure 8: Spleen infiltrated CAR T cells phenotype after MCT-1 inhibition.**

Splenic T cells were analysed as described in figure 5. Expression of (A) 41BB, (B) ICOS, (C) PD-1, (D) Ki-67, (E) LAMP-1, (F) IFN and (G) IL-2 on splenic T cells. Pooled data from two independent experiments, n=8-9 per group. Bars are mean  $\pm$  SEM. \*p < 0.05, ns = non-significant by Unpaired t test with Welch correction.
